# Supplementary material for: Divergent Temporal Trends in Morbidity and Mortality Related to Heart Failure and Atrial Fibrillation: Age, Sex, Race, and Geographic Differences in the United States, 1991–2015
Source: PubMed Central journal article supplement — J Am Heart Assoc. 2019 Apr 8;8(8):e010756. doi: 10.1161/JAHA.118.010756 (PMC6507208; doi:10.1161/jaha.118.010756), 2019-04-08
Supplement: JAH3-8-e010756-s001.pdf [file JAH3-8-e010756-s001.pdf]

# **SUPPLEMENTAL MATERIAL**

**Table S1. Summary of NIS States, 1988-2015.**

| Year | States                                                                                                                                    | Number of states |
|------|-------------------------------------------------------------------------------------------------------------------------------------------|------------------|
| 1988 | CA CO FL IA IL MA NJ WA                                                                                                                   | 8                |
| 1989 | AZ CA CO FL IA IL MA NJ PA WA WI                                                                                                          | 11               |
| 1990 | AZ CA CO FL IA IL MA NJ PA WA WI                                                                                                          | 11               |
| 1991 | AZ CA CO FL IA IL MA NJ PA WA WI                                                                                                          | 11               |
| 1992 | AZ CA CO FL IA IL MA NJ PA WA WI                                                                                                          | 11               |
| 1993 | AZ CA CO CT FL IA IL KS MA MD NJ NY OR PA SC WA WI                                                                                        | 17               |
| 1994 | AZ CA CO CT FL IA IL KS MA MD NJ NY OR PA SC WA WI                                                                                        | 17               |
| 1995 | AZ CA CO CT FL IA IL KS MA MD MO NJ NY OR PA SC TN WA WI                                                                                  | 19               |
| 1996 | AZ CA CO CT FL IA IL KS MA MD MO NJ NY OR PA SC TN WA WI                                                                                  | 19               |
| 1997 | AZ CA CO CT FL GA HI IA IL KS MA MD MO NJ NY OR PA SC TN UT WA WI                                                                         | 22               |
| 1998 | AZ CA CO CT FL GA HI IA IL KS MA MD MO NJ NY OR PA SC TN UT WA WI                                                                         | 22               |
| 1999 | AZ CA CO CT FL GA HI IA IL KS MA MD ME MO NJ NY OR PA SC TN UT VA WA WI                                                                   | 24               |
| 2000 | AZ CA CO CT FL GA HI IA IL KS KY MA MD ME MO NC NJ NY OR PA SC TN TX UT VA WA WI WV                                                       | 28               |
| 2001 | AZ CA CO CT FL GA HI IA IL KS KY MA MD ME MI MN MO NC NE NJ NY OR PA RI SC TN TX UT VA VT WA WI WV                                        | 33               |
| 2002 | CA CO CT FL GA HI IA IL KS KY MA MD ME MI MN MO NC NE NJ NV NY OH OR PA RI SC SD TN TX UT VA VT WA WI WV                                  | 35               |
| 2003 | AZ CA CO CT FL GA HI IA IL IN KS KY MA MD MI MN MO NC NE NH NJ NV NY OH OR PA RI SC SD TN TX UT VA VT WA WI WV                            | 37               |
| 2004 | AR AZ CA CO CT FL GA HI IA IL IN KS KY MA MD MI MN MO NC NE NH NJ NV NY OH OR RI SC SD TN TX UT VA VT WA WI WV                            | 37               |
| 2005 | AR AZ CA CO CT FL GA HI IA IL IN KS KY MA MD MI MN MO NC NE NH NJ NV NY OH OK OR RI SC SD TN TX UT VT WA WI WV                            | 37               |
| 2006 | AR AZ CA CO CT FL GA HI IA IL IN KS KY MA MD MI MN MO NC NE NH NJ NV NY OH OK OR RI SC SD TN TX UT VA VT WA WI WV                         | 38               |
| 2007 | AR AZ CA CO CT FL GA HI IA IL IN KS KY MA MD ME MI MN MO NC NE NH NJ NV NY OH OK OR RI SC SD TN TX UT VA VT WA WI WV WY                   | 40               |
| 2008 | AR AZ CA CO CT FL GA HI IA IL IN KS KY LA MA MD ME MI MN MO NC NE NH NJ NV NY OH OK OR PA RI SC SD TN TX UT VA VT WA WI WV WY             | 42               |
| 2009 | AR AZ CA CO CT FL GA HI IA IL IN KS KY LA MA MD ME MI MN MO MT NC NE NH NJ NM NV NY OH OK OR PA RI SC SD TN TX UT VA VT WA WI WV WY       | 44               |
| 2010 | AK AR AZ CA CO CT FL GA HI IA IL IN KS KY LA MA MD ME MI MN MO MS MT NC NE NJ NM NV NY OH OK OR PA RI SC SD TN TX UT VA VT WA WI WV WY    | 45               |
| 2011 | AK AR AZ CA CO CT FL GA HI IA IL IN KS KY LA MA MD ME MI MN MO MS MT NC ND NE NJ NM NV NY OH OK OR PA RI SC SD TN TX UT VA VT WA WI WV WY | 46               |
| 2012 | AK AR AZ CA CO CT FL GA HI IA IL IN KS KY LA MA MD MI MN MO MT NC ND NE NJ NM NV NY OH OK OR PA RI SC SD TN TX UT VA VT WA WI WV WY       | 44               |

|      |                                                                                                                                                    |    |
|------|----------------------------------------------------------------------------------------------------------------------------------------------------|----|
| 2013 | AR AZ CA CO CT DC FL GA HI IA IL IN KS KY LA MA MD MI<br>MN MO MT NC ND NE NJ NM NV NY OH OK OR PA RI SC SD<br>TN TX UT VA VT WA WI WV WY          | 44 |
| 2014 | AR AZ CA CO CT DC FL GA HI IA IL IN KS KY LA MA MD ME<br>MI MN MO MT NC ND NE NJ NM NV NY OH OK OR PA RI SC<br>SD TN TX UT VA VT WA WI WV WY       | 45 |
| 2015 | AK AR AZ CA CO CT DC FL GA HI IA IL IN KS KY LA MA MD<br>ME MI MN MO MS MT NC ND NE NJ NM NV NY OH OK OR<br>PA RI SC SD TN TX UT VA VT WA WI WV WY | 47 |

## Supplemental Methods

### Data S1. Age standardization.

Here we demonstrate age standardizing using Heart failure mortality data for 2015. Our population was all adults  $\geq 30$  years of age. We used 2000 US population to create weights for each age. Then crude rates for each age was multiplied by the 2000 weights. The weighted crude rates were summed to derive the age-adjusted rate.

**Table S2. Creating weights using 2000 population.**

| Age | Age specific 2000 population (a) | Total 2000 population (b) | 2000Weights (a/b) |
|-----|----------------------------------|---------------------------|-------------------|
| 30  | 3999004                          | 274633642                 | 0.0145612         |
| 31  | 3810183                          | 274633642                 | 0.0138737         |
| 32  | 3774385                          | 274633642                 | 0.0137433         |
| 33  | 3840938                          | 274633642                 | 0.0139857         |
| 34  | 4086860                          | 274633642                 | 0.0148811         |
| 35  | 4288078                          | 274633642                 | 0.0156138         |
| 36  | 4349620                          | 274633642                 | 0.0158379         |
| 37  | 4469476                          | 274633642                 | 0.0162743         |
| 38  | 4290207                          | 274633642                 | 0.0156216         |
| 39  | 4782575                          | 274633642                 | 0.0174144         |
| 40  | 4666685                          | 274633642                 | 0.0169924         |
| 41  | 4493582                          | 274633642                 | 0.0163621         |
| 42  | 4487560                          | 274633642                 | 0.0163402         |
| 43  | 4424004                          | 274633642                 | 0.0161087         |
| 44  | 4407398                          | 274633642                 | 0.0160483         |
| 45  | 4268017                          | 274633642                 | 0.0155408         |
| 46  | 4033859                          | 274633642                 | 0.0146881         |
| 47  | 3958468                          | 274633642                 | 0.0144136         |
| 48  | 3681489                          | 274633642                 | 0.0134051         |
| 49  | 3863960                          | 274633642                 | 0.0140695         |
| 50  | 3720935                          | 274633642                 | 0.0135487         |
| 51  | 3504329                          | 274633642                 | 0.01276           |
| 52  | 3475657                          | 274633642                 | 0.0126556         |
| 53  | 3754218                          | 274633642                 | 0.0136699         |
| 54  | 2769220                          | 274633642                 | 0.0100833         |
| 55  | 2749739                          | 274633642                 | 0.0100124         |
| 56  | 2786795                          | 274633642                 | 0.0101473         |
| 57  | 2947472                          | 274633642                 | 0.0107324         |
| 58  | 2404462                          | 274633642                 | 0.0087552         |
| 59  | 2418766                          | 274633642                 | 0.0088072         |
| 60  | 2259141                          | 274633642                 | 0.008226          |
| 61  | 2179759                          | 274633642                 | 0.007937          |
| 62  | 2132873                          | 274633642                 | 0.0077662         |
| 63  | 2030730                          | 274633642                 | 0.0073943         |
| 64  | 2051769                          | 274633642                 | 0.0074709         |
| 65  | 2033933                          | 274633642                 | 0.007406          |

|     |         |           |           |
|-----|---------|-----------|-----------|
| 66  | 1862107 | 274633642 | 0.0067803 |
| 67  | 1849893 | 274633642 | 0.0067359 |
| 68  | 1788769 | 274633642 | 0.0065133 |
| 69  | 1875238 | 274633642 | 0.0068281 |
| 70  | 1843087 | 274633642 | 0.0067111 |
| 71  | 1784744 | 274633642 | 0.0064986 |
| 72  | 1802080 | 274633642 | 0.0065618 |
| 73  | 1674285 | 274633642 | 0.0060964 |
| 74  | 1621378 | 274633642 | 0.0059038 |
| 75  | 1610943 | 274633642 | 0.0058658 |
| 76  | 1530137 | 274633642 | 0.0055716 |
| 77  | 1450062 | 274633642 | 0.00528   |
| 78  | 1456186 | 274633642 | 0.0053023 |
| 79  | 1367231 | 274633642 | 0.0049784 |
| 80  | 1172978 | 274633642 | 0.0042711 |
| 81  | 1065672 | 274633642 | 0.0038803 |
| 82  | 963587  | 274633642 | 0.0035086 |
| 83  | 890893  | 274633642 | 0.0032439 |
| 84  | 807104  | 274633642 | 0.0029388 |
| 85+ | 4259173 | 274633642 | 0.0155086 |

Age standardization of overall 2015 HF mortality rate was performed using the weights from Table 1.

**Table S3. Age standardization of overall heart failure mortality rate.**

| Age | # of hf deaths (a) | Population (b) | Rate (a*100000/b) | 2000Weights (Table 1) | Rate*2000Weights |
|-----|--------------------|----------------|-------------------|-----------------------|------------------|
| 30  | 14                 | 4417209        | 0.3169422         | 0.0145612             | 0.0046151        |
| 31  | 16                 | 4278233        | 0.3739862         | 0.0138737             | 0.0051886        |
| 32  | 15                 | 4343614        | 0.3453346         | 0.0137433             | 0.0047461        |
| 33  | 17                 | 4341754        | 0.3915468         | 0.0139857             | 0.005476         |
| 34  | 24                 | 4294838        | 0.5588104         | 0.0148811             | 0.0083157        |
| 35  | 15                 | 4379404        | 0.3425124         | 0.0156138             | 0.0053479        |
| 36  | 25                 | 4108775        | 0.6084539         | 0.0158379             | 0.0096366        |
| 37  | 24                 | 4028403        | 0.5957696         | 0.0162743             | 0.0096957        |
| 38  | 28                 | 3987141        | 0.7022576         | 0.0156216             | 0.0109704        |
| 39  | 30                 | 3870862        | 0.7750212         | 0.0174144             | 0.0134965        |
| 40  | 24                 | 3989839        | 0.601528          | 0.0169924             | 0.0102214        |
| 41  | 42                 | 3865228        | 1.086611          | 0.0163621             | 0.0177792        |
| 42  | 42                 | 3924258        | 1.070266          | 0.0163402             | 0.0174883        |
| 43  | 72                 | 4100708        | 1.755794          | 0.0161087             | 0.0282836        |
| 44  | 72                 | 4335165        | 1.660836          | 0.0160483             | 0.0266536        |
| 45  | 74                 | 4389345        | 1.685901          | 0.0155408             | 0.0262002        |
| 46  | 72                 | 4160573        | 1.730531          | 0.0146881             | 0.0254183        |
| 47  | 85                 | 4073685        | 2.086563          | 0.0144136             | 0.0300749        |

|                   |       |         |          |           |           |
|-------------------|-------|---------|----------|-----------|-----------|
| 48                | 100   | 4077689 | 2.452369 | 0.0134051 | 0.0328742 |
| 49                | 116   | 4152552 | 2.793463 | 0.0140695 | 0.0393027 |
| 50                | 146   | 4400288 | 3.317965 | 0.0135487 | 0.0449542 |
| 51                | 154   | 4479664 | 3.437758 | 0.01276   | 0.0438658 |
| 52                | 193   | 4474344 | 4.313481 | 0.0126556 | 0.0545898 |
| 53                | 227   | 4463494 | 5.085702 | 0.0136699 | 0.0695211 |
| 54                | 232   | 4516527 | 5.13669  | 0.0100833 | 0.0517949 |
| 55                | 252   | 4553385 | 5.534344 | 0.0100124 | 0.055412  |
| 56                | 255   | 4399120 | 5.796614 | 0.0101473 | 0.0588201 |
| 57                | 326   | 4371245 | 7.457829 | 0.0107324 | 0.0800402 |
| 58                | 375   | 4320522 | 8.679507 | 0.0087552 | 0.0759905 |
| 59                | 398   | 4163670 | 9.558875 | 0.0088072 | 0.0841874 |
| 60                | 444   | 4125792 | 10.76157 | 0.008226  | 0.0885249 |
| 61                | 452   | 3954601 | 11.42972 | 0.007937  | 0.0907174 |
| 62                | 502   | 3801935 | 13.2038  | 0.0077662 | 0.102544  |
| 63                | 576   | 3651393 | 15.7748  | 0.0073943 | 0.116644  |
| 64                | 542   | 3536156 | 15.32738 | 0.0074709 | 0.1145098 |
| 65                | 621   | 3450043 | 17.99977 | 0.007406  | 0.1333061 |
| 66                | 681   | 3344134 | 20.36402 | 0.0067803 | 0.1380748 |
| 67                | 765   | 3304187 | 23.15244 | 0.0067359 | 0.1559516 |
| 68                | 854   | 3436357 | 24.8519  | 0.0065133 | 0.1618677 |
| 69                | 745   | 2532747 | 29.4147  | 0.0068281 | 0.2008478 |
| 70                | 879   | 2492490 | 35.26594 | 0.0067111 | 0.2366724 |
| 71                | 975   | 2421191 | 40.26944 | 0.0064986 | 0.2616964 |
| 72                | 1061  | 2469605 | 42.96234 | 0.0065618 | 0.2819085 |
| 73                | 1079  | 2146052 | 50.27837 | 0.0060964 | 0.3065186 |
| 74                | 1121  | 1953711 | 57.37798 | 0.0059038 | 0.3387473 |
| 75                | 1268  | 1839823 | 68.91967 | 0.0058658 | 0.4042682 |
| 76                | 1284  | 1722041 | 74.56268 | 0.0055716 | 0.4154302 |
| 77                | 1439  | 1639085 | 87.79288 | 0.00528   | 0.4635453 |
| 78                | 1481  | 1500813 | 98.67985 | 0.0053023 | 0.5232288 |
| 79                | 1651  | 1422071 | 116.0983 | 0.0049784 | 0.5779815 |
| 80                | 1898  | 1351196 | 140.4682 | 0.0042711 | 0.5999486 |
| 81                | 1960  | 1201044 | 163.1914 | 0.0038803 | 0.633238  |
| 82                | 2195  | 1148948 | 191.0443 | 0.0035086 | 0.6703033 |
| 83                | 2460  | 1082562 | 227.2387 | 0.0032439 | 0.7371472 |
| 84                | 2621  | 1015591 | 258.0763 | 0.0029388 | 0.7584447 |
| 85                | 42178 | 6287161 | 670.8593 | 0.0155086 | 10.40406  |
|                   |       |         |          |           |           |
| Age-adjusted rate |       |         |          |           | 19.87     |

**Table S4. Age standardization of overall heart failure mortality rate among men.**

| Age | # of hf deaths (a) | Population (b) | Rate (a*100000/b) | 2000Weights (Table 1) | Rate*2000Weights |
|-----|--------------------|----------------|-------------------|-----------------------|------------------|
| 30  | 8                  | 2231463        | 0.3585092         | 0.0145612             | 0.0052203        |
| 31  | 12                 | 2152765        | 0.5574226         | 0.0138737             | 0.0077335        |
| 32  | 11                 | 2181163        | 0.5043181         | 0.0137433             | 0.006931         |
| 33  | 12                 | 2175631        | 0.5515641         | 0.0139857             | 0.007714         |
| 34  | 16                 | 2148717        | 0.7446304         | 0.0148811             | 0.0110809        |
| 35  | 9                  | 2199270        | 0.4092267         | 0.0156138             | 0.0063896        |
| 36  | 19                 | 2053297        | 0.9253411         | 0.0158379             | 0.0146555        |
| 37  | 9                  | 2010463        | 0.4476581         | 0.0162743             | 0.0072853        |
| 38  | 21                 | 1983816        | 1.058566          | 0.0156216             | 0.0165365        |
| 39  | 15                 | 1926578        | 0.7785826         | 0.0174144             | 0.0135585        |
| 40  | 14                 | 1989213        | 0.7037959         | 0.0169924             | 0.0119592        |
| 41  | 26                 | 1919064        | 1.354827          | 0.0163621             | 0.0221678        |
| 42  | 25                 | 1942311        | 1.287127          | 0.0163402             | 0.0210319        |
| 43  | 54                 | 2032362        | 2.657007          | 0.0161087             | 0.0428011        |
| 44  | 52                 | 2147203        | 2.421755          | 0.0160483             | 0.038865         |
| 45  | 51                 | 2182484        | 2.336787          | 0.0155408             | 0.0363155        |
| 46  | 43                 | 2064898        | 2.082427          | 0.0146881             | 0.030587         |
| 47  | 51                 | 2019602        | 2.52525           | 0.0144136             | 0.036398         |
| 48  | 65                 | 2015073        | 3.22569           | 0.0134051             | 0.0432407        |
| 49  | 77                 | 2052872        | 3.750843          | 0.0140695             | 0.0527725        |
| 50  | 95                 | 2173002        | 4.371832          | 0.0135487             | 0.0592327        |
| 51  | 92                 | 2202725        | 4.176645          | 0.01276               | 0.053294         |
| 52  | 111                | 2195088        | 5.056745          | 0.0126556             | 0.0639962        |
| 53  | 136                | 2186448        | 6.220134          | 0.0136699             | 0.0850287        |
| 54  | 149                | 2206584        | 6.752519          | 0.0100833             | 0.0680878        |
| 55  | 163                | 2228498        | 7.314343          | 0.0100124             | 0.0732341        |
| 56  | 173                | 2143285        | 8.071722          | 0.0101473             | 0.0819063        |
| 57  | 205                | 2124551        | 9.649097          | 0.0107324             | 0.1035578        |
| 58  | 241                | 2092228        | 11.51882          | 0.0087552             | 0.1008491        |
| 59  | 244                | 2009005        | 12.14532          | 0.0088072             | 0.1069668        |
| 60  | 291                | 1987008        | 14.64513          | 0.008226              | 0.1204711        |
| 61  | 302                | 1893657        | 15.94798          | 0.007937              | 0.1265786        |
| 62  | 310                | 1815914        | 17.07129          | 0.0077662             | 0.1325799        |
| 63  | 372                | 1741514        | 21.36072          | 0.0073943             | 0.1579481        |
| 64  | 325                | 1679087        | 19.35576          | 0.0074709             | 0.1446055        |
| 65  | 360                | 1637936        | 21.97888          | 0.007406              | 0.1627753        |
| 66  | 419                | 1583339        | 26.46306          | 0.0067803             | 0.1794283        |
| 67  | 460                | 1562960        | 29.43134          | 0.0067359             | 0.1982453        |
| 68  | 518                | 1623929        | 31.89795          | 0.0065133             | 0.2077606        |
| 69  | 422                | 1188026        | 35.52111          | 0.0068281             | 0.2425432        |

|                   |       |         |          |           |           |
|-------------------|-------|---------|----------|-----------|-----------|
| 70                | 487   | 1162672 | 41.88628 | 0.0067111 | 0.281102  |
| 71                | 548   | 1123102 | 48.79343 | 0.0064986 | 0.3170907 |
| 72                | 598   | 1140651 | 52.4262  | 0.0065618 | 0.3440081 |
| 73                | 614   | 983641  | 62.42115 | 0.0060964 | 0.3805462 |
| 74                | 620   | 886092  | 69.97016 | 0.0059038 | 0.4130888 |
| 75                | 689   | 829659  | 83.04617 | 0.0058658 | 0.4871313 |
| 76                | 696   | 774758  | 89.8345  | 0.0055716 | 0.5005181 |
| 77                | 809   | 728549  | 111.0426 | 0.00528   | 0.5863037 |
| 78                | 781   | 659853  | 118.3597 | 0.0053023 | 0.6275769 |
| 79                | 855   | 618087  | 138.33   | 0.0049784 | 0.6886598 |
| 80                | 986   | 578240  | 170.5174 | 0.0042711 | 0.728291  |
| 81                | 972   | 507988  | 191.3431 | 0.0038803 | 0.7424764 |
| 82                | 1065  | 477629  | 222.9764 | 0.0035086 | 0.7823411 |
| 83                | 1167  | 442175  | 263.9227 | 0.0032439 | 0.8561474 |
| 84                | 1257  | 406633  | 309.124  | 0.0029388 | 0.9084655 |
| 85                | 15511 | 2174298 | 713.3797 | 0.0155086 | 11.06349  |
|                   |       |         |          |           |           |
| Age-adjusted rate |       |         |          |           | 22.60     |



## Data S2. Differentiating primary (Underlying cause of death) and secondary (multiple conditions).

In order to delineate HF deaths with and without AF and vice versa, we performed additional sensitivity analysis for overall HF and AF mortality. For the current analysis we use only “ucod” or “Underlying cause of death” which is presented as a single ICD-9 or ICD-10 code. In the revised manuscript, we considered the “ucod” as primary variable (say for example record 1 died of HF as per ucod), then we also created a secondary diagnosis using part/line number on death certificate, sequence of condition within part/ line, and condition code for presence of AF in these secondary codes. There were none to 20 other conditions to identify secondary diagnosis. We created the three groups using both primary and secondary diagnosis:

G1= have a primary diagnosis of HF but no secondary diagnosis of AF.

G2= have a primary diagnosis of AF but no secondary diagnosis of HF.

G3= have a primary diagnosis of HF and a secondary diagnosis of AF.

Each year of mortality data is different and some sort of a harmonization is required. With regards to multiple conditions associated with death, the years 1991-2004 is similar where they provide 20 different options of ICD-9 and ICD-10 codes as secondary diagnoses. 1991 to 1998 used ICD-9 codes and 1999-2004 used ICD-10 codes. Now from 2004-2004, there is only 1 variable with very few secondary diagnoses from which we had to identify the secondary diagnoses. The table below provides all the counts per year and the three groups. HF and AF are based on “ucod” or the underlying codes which is the primary diagnosis. There is obvious data discrepancy in group 3. Group 2 (primary diagnosis of AF without a secondary diagnosis of HF) demonstrates a 5X increase in counts from 1991 to 2015 and 6X increase in counts from 1991 to 2015. Group 1 (primary diagnosis of HF without a secondary diagnosis of AF) demonstrates a 2X increase in counts from 1991 to 2015 and 2X increase in counts from 1991 to 2015. While there is an apparent increase in gp1-3, there are wide changes in secondary diagnosis measurement that may introduce a bias in such sensitivity analysis. There is lack of uniformity in data collection and measurement of multiple conditions. The use of biased measurements to identify “secondary analysis” may yield incorrect results. Additionally, we assessed published “global burden of Diseases studies manuscripts [PMID: 30497964, 30507459, 30553848 etc.] and found they use systematic review and majority of the published scientific literature and surveys use single estimates. Therefore, using multiple conditions variable(s) to remove those with secondary HF or AF may yield incorrect results. Accordingly, we limited our analyses to using HF and AF as primary diagnoses as underlying cause of death.

| year | hf    | af   | gp1   | gp2  | gp3  |
|------|-------|------|-------|------|------|
| 1991 | 39077 | 3678 | 38142 | 2509 | 935  |
| 1992 | 39987 | 4056 | 38946 | 2759 | 1041 |
| 1993 | 45494 | 4657 | 44248 | 3162 | 1246 |
| 1994 | 45049 | 5082 | 43677 | 3430 | 1372 |
| 1995 | 46404 | 5661 | 44951 | 3877 | 1453 |
| 1996 | 47129 | 6204 | 45566 | 4314 | 1563 |
| 1997 | 48836 | 6484 | 47056 | 4564 | 1780 |
| 1998 | 50155 | 7188 | 48341 | 4941 | 1814 |
| 1999 | 54841 | 8339 | 54841 | 6006 | 0    |
| 2000 | 55597 | 8738 | 55597 | 6272 | 0    |

|      |       |       |       |       |      |
|------|-------|-------|-------|-------|------|
| 2001 | 56827 | 9456  | 56827 | 6798  | 0    |
| 2002 | 56404 | 10098 | 56404 | 7169  | 0    |
| 2003 | 57352 | 10533 | 57352 | 7478  | 0    |
| 2004 | 57028 | 10616 | 57028 | 7461  | 0    |
| 2005 | 58843 | 11560 | 55812 | 8086  | 3031 |
| 2006 | 60272 | 11445 | 57052 | 8022  | 3220 |
| 2007 | 56481 | 14496 | 55724 | 8541  | 757  |
| 2008 | 56739 | 15386 | 55850 | 9118  | 889  |
| 2009 | 56312 | 15438 | 55412 | 9155  | 900  |
| 2010 | 57649 | 16465 | 56703 | 9683  | 946  |
| 2011 | 58235 | 17738 | 57324 | 10386 | 911  |
| 2012 | 60247 | 19499 | 59152 | 11416 | 1095 |
| 2013 | 65048 | 20752 | 64021 | 12002 | 1027 |
| 2014 | 68553 | 21722 | 67456 | 12266 | 1097 |
| 2015 | 75197 | 23882 | 74018 | 13032 | 1179 |

**Table S5. Temporal trends of primary heart failure and atrial fibrillation hospitalizations among national hospitalization aged  $\geq 30$  years in the United States, NIS 1993-2014.**

| Year        | Total, N      | Heart failure |                       | Atrial fibrillation |                       |
|-------------|---------------|---------------|-----------------------|---------------------|-----------------------|
|             |               | N             | Age standardized Rate | N                   | Age standardized Rate |
| Total       | 3,735,946,974 | 22,828,980    | 348.59                | 7,378,978           | 112.47                |
| 1993        | 146,289,284   | 1,000,255     | 407.45                | 228,101             | 91.71                 |
| 1994        | 149,051,556   | 986,428       | 394.83                | 235,668             | 93.40                 |
| 1995        | 151,652,520   | 1,003,220     | 394.21                | 240,642             | 93.66                 |
| 1996        | 154,029,428   | 1,037,718     | 400.50                | 254,334             | 97.41                 |
| 1997        | 156,352,718   | 1,045,352     | 396.59                | 258,416             | 97.40                 |
| 1998        | 158,563,193   | 1,082,654     | 403.54                | 278,252             | 103.23                |
| 1999        | 160,833,712   | 1,041,248     | 381.48                | 283,712             | 103.67                |
| 2000        | 163,190,685   | 1,077,228     | 387.89                | 311,370             | 111.97                |
| 2001        | 165,485,781   | 1,099,906     | 391.09                | 334,335             | 118.69                |
| 2002        | 167,516,688   | 1,087,919     | 380.05                | 334,800             | 116.83                |
| 2003        | 169,318,844   | 1,136,437     | 391.08                | 330,435             | 113.67                |
| 2004        | 171,098,329   | 1,118,443     | 378.12                | 320,220             | 108.28                |
| 2005        | 173,016,674   | 1,088,020     | 361.51                | 337,013             | 111.86                |
| 2006        | 174,909,348   | 1,089,125     | 355.00                | 363,401             | 118.44                |
| 2007        | 176,861,079   | 1,022,347     | 326.34                | 358,189             | 114.46                |
| 2008        | 178,892,422   | 1,014,376     | 317.90                | 404,343             | 126.98                |
| 2009        | 181,028,788   | 1,032,642     | 316.90                | 414,512             | 127.37                |
| 2010        | 183,312,017   | 988,664       | 297.01                | 402,501             | 121.01                |
| 2011        | 185,415,602   | 996,146       | 293.40                | 437,295             | 128.83                |
| 2012        | 187,598,387   | 944,615       | 271.86                | 434,645             | 125.02                |
| 2013        | 189,706,903   | 953,554       | 269.03                | 420,360             | 118.39                |
| 2014        | 191,823,016   | 982,680       | 271.25                | 396,435             | 109.05                |
| Change (SE) |               |               | -7.02 (0.58)          |                     | 1.48 (0.22)           |
| % change    |               |               | -1.72%                |                     | 1.61%                 |
| p-trend     |               |               | <0.0001               |                     | <0.0001               |

HF- heart failure, AF- atrial fibrillation. Total denotes the survey-weighted counts of all hospitalizations  $>30$  years old. All rates are use survey-weighted counts per 100,000 population and age standardized. Change denotes annual change in rate per 100,000 population and is calculated from random effects meta-regression model with year as a continuous covariate. A negative value indicates decline and positive value indicates increase in annual change per 100,000 and standard error (SE) from 1993 to 2014. % change denotes percent change ( $100 \times \text{slope}$ )/rate in 1991. P-trend calculated using meta-regression indicates the significance of the decline or the increase in hospitalization rates of primary heart failure hospitalizations from 1993 to 2014.

**Table S6. Temporal trends and annual change of all primary heart failure and atrial fibrillation hospitalizations in each region and division from 1993 to 2014.**

|                        | Heart Failure, rates per 100,000 |       |               |        |         | Atrial fibrillation, rates per 100,000 |       |              |        |         |
|------------------------|----------------------------------|-------|---------------|--------|---------|----------------------------------------|-------|--------------|--------|---------|
|                        | 1993                             | 2014  | Change (SE)   | %      | p-trend | 1993                                   | 2014  | Change (SE)  | %      | p-trend |
| <b>R1: Northeast</b>   | 423.7                            | 279.9 | -7.80 (0.50)  | -1.84% | <0.0001 | 96.1                                   | 119.6 | 1.33 (0.29)  | 1.39%  | <0.0001 |
| D1: New England        | 336.0                            | 267.3 | -1.77 (1.70)  | -0.53% | 0.31    | 92.1                                   | 114.4 | 2.51 (0.64)  | 2.72%  | 0.001   |
| D2: Middle Atlantic    | 454.0                            | 284.6 | -9.89 (0.99)  | -2.18% | <0.0001 | 97.5                                   | 121.5 | 0.93 (0.47)  | 0.95%  | 0.064   |
|                        |                                  |       |               |        |         |                                        |       |              |        |         |
| <b>R2: Midwest</b>     | 373.2                            | 242.4 | -7.09 (0.47)  | -1.90% | <0.0001 | 84.9                                   | 102.9 | 1.02 (0.26)  | 1.20%  | 0.001   |
| D3: East North central | 373.0                            | 304.2 | -1.31 (1.33)  | -0.35% | 0.34    | 77.0                                   | 125.5 | 3.81 (0.40)  | 4.95%  | <0.0001 |
| D4: West North central | 351.3                            | 247.0 | -9.75 (1.86)  | -2.77% | <0.0001 | 102.4                                  | 109.1 | 0.50 (0.55)  | 0.49%  | 0.38    |
|                        |                                  |       |               |        |         |                                        |       |              |        |         |
| <b>R3: South</b>       | 475.1                            | 302.0 | -9.23 (0.78)  | -1.94% | <0.0001 | 103.1                                  | 118.4 | 1.28 (0.23)  | 1.24%  | <0.0001 |
| D5: South Atlantic     | 881.4                            | 293.5 | -27.86 (1.53) | -3.16% | <0.0001 | 190.8                                  | 119.8 | -2.59 (0.37) | -1.36% | <0.0001 |
| D6: East South Central |                                  |       |               |        |         |                                        |       |              |        |         |
| D7: West South Central |                                  |       |               |        |         |                                        |       |              |        |         |
|                        |                                  |       |               |        |         |                                        |       |              |        |         |
| <b>R4: West</b>        | 319.8                            | 194.6 | -5.65 (0.33)  | -1.77% | <0.0001 | 75.6                                   | 73.2  | 0.74 (0.19)  | 0.98%  | 0.001   |
| D8: Mountain           | 220.5                            | 167.2 | 0.68 (0.76)   | 0.31%  | 0.38    | 57.4                                   | 80.5  | 2.97 (0.39)  | 5.18%  | <0.0001 |
| D9: Pacific            | 356.5                            | 206.9 | -8.01 (0.54)  | -2.25% | <0.0001 | 82.4                                   | 69.8  | -0.17 (0.21) | -0.21% | 0.42    |

All rates are survey-weighted, per 100,000 population and age-standardized. Change denotes annual change in rate per 100,000 population and is calculated from survey weighted counts, population sizes and a random effects meta-regression model with year as a continuous covariate. A negative value indicates decline and positive value indicates increase in annual change per 100,000 and standard error (SE) from 1993 to 2011. P-trend calculated using meta-regression indicates the significance of the decline or the increase in hospitalization rates of primary HFU hospitalizations from 1993 to 2014. D6 is missing years 1993 and 1994. D7 is missing years 1993 to 1999.

**Table S7. Temporal trends and annual change of YPLL at 75 for heart failure and atrial fibrillation, 1991-2015.**

|                            | 1991 | 1998 | 2007 | 2015 | Change (SE)  | %    | P-trend | P-interaction |
|----------------------------|------|------|------|------|--------------|------|---------|---------------|
| <b>Heart failure</b>       |      |      |      |      |              |      |         |               |
| Overall                    | 27.9 | 27.2 | 28.9 | 34.5 | 0.11 (0.05)  | 0.4  | 0.022   |               |
| <b>By sex</b>              |      |      |      |      |              |      |         | 0.038         |
| Women                      | 21.7 | 21.7 | 22.2 | 25.3 | 0.03 (0.04)  | 0.1  | 0.464   |               |
| Men                        | 34.9 | 33.3 | 36.1 | 44.4 | 0.18 (0.06)  | 0.5  | 0.004   |               |
| <b>By race/ ethnicity</b>  |      |      |      |      |              |      |         | <0.0001       |
| White                      | 24.4 | 24.3 | 25.1 | 30.4 | 0.10 (0.04)  | 0.4  | 0.038   |               |
| Black                      | 61.5 | 61.2 | 69.9 | 81.1 | 0.49 (0.12)  | 0.8  | 0.001   |               |
| Hispanic                   | 14.4 | 16.8 | 17.6 | 20.6 | 0.13 (0.03)  | 0.9  | 0.001   |               |
| Other                      | 40   | 11.4 | 10.7 | 15.2 | -0.97 (0.19) | -2.4 | <0.0001 |               |
| <b>ATRIAL FIBRILLATION</b> |      |      |      |      |              |      |         |               |
| Overall                    | 1.9  | 2.3  | 3.9  | 6.3  | 0.18 (0.01)  | 9.8  | <0.0001 |               |
| <b>By sex</b>              |      |      |      |      |              |      |         | <0.0001       |
| Women                      | 1.5  | 1.8  | 3.1  | 4.5  | 0.12 (0.01)  | 8.1  | <0.0001 |               |
| Men                        | 2.2  | 2.8  | 4.7  | 8.3  | 0.24 (0.02)  | 10.9 | <0.0001 |               |
| <b>By race/ ethnicity</b>  |      |      |      |      |              |      |         | <0.0001       |
| White                      | 1.7  | 2.3  | 3.9  | 6.6  | 0.20 (0.01)  | 11.5 | <0.0001 |               |
| Black                      | 3.1  | 3.1  | 5.4  | 8.2  | 0.22 (0.02)  | 7.3  | <0.0001 |               |
| Hispanic                   | 1.2  | 1    | 2.7  | 3.2  | 0.10 (0.01)  | 8.4  | <0.0001 |               |
| Other                      | 3.4  | 1.3  | 1.8  | 3.3  | 0.04 (0.02)  | 1.0* | 0.107   |               |

For each death,  $YPLL_{k,i} = ((\text{number of death at a given age}) * (\text{weight for that age})) = D_{k,i} W_i$ .  $k$  is the particular cause of death and  $i$  is age group or age of death. For each age group, these YPLL per person/ deaths is summated. Weight of each age is calculated by weight for that age as  $W_i = \text{Sum}(\text{weight for each year of life remaining}) = \sum w_j$ , where  $j$  is in range  $i..x$ .

We then discounted the total years of life lost by 1.5%. YPLL rate is then calculated per age by (Number of YPLLs/Population under end point age) x 100,000, and then age standardized. Change denotes annual change in rate per 100,000 population and is calculated from observed rates using a random effects meta-regression model with year as a continuous covariate. A negative value indicates decline and positive value indicates increase in annual change per 100,000 and standard error (SE) from 1991 to 2015. P-trend calculated using Poisson models indicates the significance of the decline or the increase in death rates of from 1991 to 2015. P-interaction was calculated by adding an interactive term between the covariate and year in the model.

**Table S8. Temporal trends and annual change of YPLL at 75 years due to heart failure and atrial fibrillation in states, 1991-2015.**

| State                | YPLL per 100,000 due to Heart Failure |      |       |              |                     |            |         | YPLL per 100,000 due to Atrial Fibrillation |      |      |             |             |              |         |
|----------------------|---------------------------------------|------|-------|--------------|---------------------|------------|---------|---------------------------------------------|------|------|-------------|-------------|--------------|---------|
|                      | Age-adjusted rate per 100,000         |      |       |              | Annual              |            |         | Age-adjusted rate per 100,000               |      |      |             | Annual      |              |         |
|                      | 1991                                  | 1998 | 2007  | 2015         | Change (SE)         | %          | p-trend | 1991                                        | 1998 | 2007 | 2015        | Change (SE) | %            | p-trend |
| Alabama              | 100.7                                 | 77.6 | 105.1 | <b>101.6</b> | 0.56 (0.35)         | <b>0.6</b> | 0.118   | 1.5                                         | 3.9  | 4.5  | <b>10.3</b> | 0.29 (0.03) | 18.8         | <0.0001 |
| Alaska               | 34.7                                  | 11.8 | 16.1  | 18.9         | -0.02 (0.24)        | 0          | 0.946   | 9.1                                         | 5.9  | 1.3  | 4.5         | 0.05 (0.08) | 0.5          | 0.568   |
| Arizona              | 52.4                                  | 18.3 | 12.9  | 9.3          | <b>-1.38 (0.21)</b> | -2.6       | <0.0001 | 1.2                                         | 3.5  | 1.5  | 6.1         | 0.11 (0.03) | 9.1          | 0.001   |
| Arkansas             | 57.5                                  | 68.8 | 42.5  | 48.6         | -0.73 (0.36)        | -1.3       | 0.052   | 1.9                                         | 1.7  | 1.8  | 7.2         | 0.19 (0.03) | 9.7          | <0.0001 |
| California           | 15.4                                  | 12.5 | 16.9  | 26.1         | 0.37 (0.06)         | <b>2.4</b> | <0.0001 | 1.6                                         | 0.9  | 3.2  | 5.4         | 0.19 (0.02) | 12.1         | <0.0001 |
| Colorado             | 12.9                                  | 32.5 | 13.2  | 17.1         | -0.12 (0.13)        | -0.9       | 0.369   | 0.8                                         | 3.7  | 3    | 3.9         | 0.11 (0.02) | 13.4         | <0.0001 |
| Connecticut          | 16.4                                  | 21.2 | 16.3  | 16.6         | -0.19 (0.07)        | -1.1       | 0.011   | 1                                           | 1.7  | 5.8  | 7           | 0.19 (0.03) | 20.3         | <0.0001 |
| Delaware             | 30.1                                  | 15.7 | 24.3  | 32.7         | -0.10 (0.16)        | -0.3       | 0.509   | 3.4                                         | 5    | 9.4  | 0.4         | 0.10 (0.08) | 3            | 0.185   |
| District of Columbia | 60.1                                  | 57   | 33.8  | 40.9         | <b>-2.26 (0.43)</b> | -3.8       | <0.0001 | 3.6                                         | 1.4  | 0.8  | <b>13.7</b> | 0.14 (0.10) | 4            | 0.173   |
| Florida              | 8.9                                   | 7.3  | 15.9  | 23.4         | 0.55 (0.05)         | <b>6.2</b> | <0.0001 | 1.9                                         | 2    | 4.4  | 3.8         | 0.15 (0.01) | 8            | <0.0001 |
| Georgia              | 49.9                                  | 58.5 | 59.4  | 64.8         | 0.55 (0.14)         | <b>1.1</b> | 0.001   | 2                                           | 3    | 4.6  | 9.1         | 0.23 (0.02) | 11.5         | <0.0001 |
| Hawaii               | 14.2                                  | 9.6  | 10.9  | 31.4         | 0.46 (0.15)         | <b>3.3</b> | 0.006   | 5                                           | 2.4  | 2.9  | 4.3         | 0.16 (0.07) | 3.1          | 0.03    |
| Idaho                | 20.6                                  | 19.4 | 19.9  | 22           | -0.07 (0.11)        | -0.4       | 0.496   | 1.7                                         | 5.9  | 3.2  | 5.3         | 0.14 (0.05) | 8.5          | 0.009   |
| Illinois             | 28.3                                  | 33.7 | 33.8  | 39.2         | 0.24 (0.05)         | <b>0.9</b> | <0.0001 | 2                                           | 1.5  | 3.5  | 5.8         | 0.17 (0.02) | 8.4          | <0.0001 |
| Indiana              | 36.8                                  | 38.6 | 41.9  | 35.8         | 0.01 (0.13)         | 0          | 0.957   | 1.1                                         | 2.1  | 4.2  | 6.5         | 0.25 (0.02) | 23           | <0.0001 |
| Iowa                 | 10.4                                  | 7.1  | 9.9   | 11.4         | 0.23 (0.06)         | <b>2.2</b> | <0.0001 | 0.2                                         | 0.5  | 2.5  | 3.7         | 0.18 (0.03) | <b>108.4</b> | <0.0001 |
| Kansas               | 32.8                                  | 25.4 | 40.6  | 37.1         | 0.46 (0.12)         | <b>1.4</b> | 0.001   | 0.1                                         | 1.1  | 3.5  | 2.3         | 0.16 (0.03) | <b>138.2</b> | <0.0001 |
| Kentucky             | 48.9                                  | 49.6 | 54.2  | 68.8         | -0.09 (0.21)        | -0.2       | 0.674   | 1.5                                         | 2.1  | 5    | <b>13.1</b> | 0.32 (0.04) | 22.2         | <0.0001 |
| Louisiana            | 54.8                                  | 52.5 | 67.9  | <b>104.1</b> | <b>1.42 (0.21)</b>  | <b>2.6</b> | <0.0001 | 4.4                                         | 3.2  | 6.9  | 7.5         | 0.15 (0.03) | 3.3          | <0.0001 |
| Maine                | 19                                    | 19.7 | 15.1  | 15.5         | -0.21 (0.07)        | -1.1       | 0.011   | 2.8                                         | 3.1  | 4.6  | 7.2         | 0.13 (0.04) | 4.6          | 0.002   |
| Maryland             | 27.1                                  | 17.4 | 15.4  | 19.5         | -0.42 (0.08)        | -1.5       | <0.0001 | 3.1                                         | 2.3  | 4.2  | 6           | 0.10 (0.02) | 3.2          | <0.0001 |
| Massachusetts        | 29                                    | 25   | 19.6  | 26.8         | -0.30 (0.08)        | -1         | 0.002   | 2.1                                         | 3.5  | 4    | 4.9         | 0.11 (0.02) | 5.2          | <0.0001 |
| Michigan             | 23.5                                  | 27.7 | 28.4  | 37           | 0.24 (0.07)         | <b>1</b>   | 0.001   | 2.1                                         | 1.8  | 3.5  | 6.4         | 0.18 (0.01) | 8.4          | <0.0001 |
| Minnesota            | 15.9                                  | 18.8 | 14.1  | 17.3         | -0.10 (0.05)        | -0.6       | 0.071   | 1.2                                         | 3.5  | 2.8  | 4.6         | 0.15 (0.02) | 12.3         | <0.0001 |
| Mississippi          | 72.6                                  | 87.8 | 108.3 | <b>111.5</b> | 0.44 (0.33)         | <b>0.6</b> | 0.196   | 2.4                                         | 3.6  | 3.9  | 8.8         | 0.26 (0.04) | 10.8         | <0.0001 |
| Missouri             | 36.5                                  | 29.8 | 33.8  | 54.8         | 0.32 (0.14)         | <b>0.9</b> | 0.03    | 2.2                                         | 2.4  | 3.8  | 5.6         | 0.22 (0.02) | 9.9          | <0.0001 |
| Montana              | 27.4                                  | 31   | 22.3  | 31           | -0.38 (0.18)        | -1.4       | 0.046   | 3.1                                         | 0.2  | 2.9  | 8.3         | 0.09 (0.06) | 2.8          | 0.162   |
| Nebraska             | 40.4                                  | 46.1 | 35.2  | 43.5         | -0.64 (0.25)        | -1.6       | 0.019   | 1.9                                         | 2.9  | 6.4  | 6.9         | 0.24 (0.04) | 12.4         | <0.0001 |
| Nevada               | 33.9                                  | 50.9 | 32.4  | 27           | -0.97 (0.23)        | -2.9       | <0.0001 | 0.7                                         | 2.7  | 3.7  | 5.9         | 0.14 (0.04) | 19.6         | 0.006   |
| New Hampshire        | 17.7                                  | 6.6  | 9.4   | 13.9         | 0.28 (0.12)         | <b>1.6</b> | 0.032   | 0.4                                         | 1    | 6.4  | 4.9         | 0.15 (0.05) | 41           | 0.005   |
| New Jersey           | 18.8                                  | 16   | 15.4  | 18.9         | -0.03 (0.05)        | -0.1       | 0.567   | 1.4                                         | 2.3  | 2.4  | 5.8         | 0.17 (0.02) | 12           | <0.0001 |
| New Mexico           | 23.6                                  | 13   | 25.3  | 26           | -0.30 (0.14)        | -1.3       | 0.039   | 0.9                                         | 2.1  | 1    | 5.5         | 0.09 (0.04) | 10.8         | 0.032   |

|                |      |      |      |                 |                     |                          |         |     |     |     |           |                |      |                 |
|----------------|------|------|------|-----------------|---------------------|--------------------------|---------|-----|-----|-----|-----------|----------------|------|-----------------|
| New York       | 18.3 | 20.6 | 15.2 | 19.8            | -0.13 (0.07)        | -0.7                     | 0.066   | 2   | 2.1 | 2.9 | 4.1       | 0.09 (0.01)    | 4.5  | <0.0001         |
| North Carolina | 27.9 | 21.3 | 29.9 | 43.2            | 0.50 (0.10)         | <b>1.8</b>               | <0.0001 | 0.9 | 3.1 | 4.9 | 6.2       | 0.20 (0.02)    | 21.3 | <0.0001         |
| North Dakota   | 29.3 | 13.3 | 22.6 | 20.7            | -0.02 (0.22)        | -0.1                     | 0.93    | 0   | 4.6 | 3.2 | 7.8       | 0.14 (0.07)    | .    | 0.069           |
| Ohio           | 28.7 | 25.1 | 17.6 | 35.2            | 0.03 (0.12)         | <b>0.1</b>               | 0.832   | 1.8 | 2.5 | 5.1 | 8.1       | 0.23 (0.02)    | 13.1 | <0.0001         |
| Oklahoma       | 42   | 43.5 | 81.1 | 52.8            | 1.17 (0.42)         | <b>2.8</b>               | 0.01    | 0.5 | 1.5 | 5.1 | 9.7       | 0.38 (0.04)    | 84.3 | <0.0001         |
| Oregon         | 14.3 | 21.3 | 20.4 | 28.5            | 0.18 (0.11)         | <b>1.3</b>               | 0.103   | 0.9 | 3.4 | 6.9 | 9.3       | 0.29 (0.03)    | 32.2 | <0.0001         |
| Pennsylvania   | 32.2 | 27.7 | 31.9 | 34.2            | -0.20 (0.08)        | -0.6                     | 0.022   | 2.8 | 2.5 | 3.4 | 6.7       | 0.18 (0.02)    | 6.5  | <0.0001         |
| Rhode Island   | 26.2 | 9.6  | 6    | 18.6            | -0.08 (0.17)        | -0.3                     | 0.653   | 2.9 | 3.4 | 3.4 | 3.3       | 0.06 (0.04)    | 2    | 0.144           |
| South Carolina | 45.1 | 60.7 | 46.4 | 53.1            | 0.17 (0.23)         | <b>0.4</b>               | 0.455   | 5.7 | 5.2 | 6.3 | 9.4       | 0.19 (0.04)    | 3.4  | <0.0001         |
| South Dakota   | 10.7 | 22.4 | 7.9  | 4.4             | <b>-1.04 (0.30)</b> | -9.7                     | 0.002   | 1.5 | 2.7 | 3.3 | 1.9       | 0.03 (0.05)    | 1.7  | 0.623           |
| Tennessee      | 17.6 | 22.7 | 26.2 | 39.6            | <b>0.66 (0.13)</b>  | <b>3.7</b>               | <0.0001 | 1.2 | 3.4 | 4.9 | 9         | 0.31 (0.04)    | 26.2 | <0.0001         |
| Texas          | 23.7 | 34.1 | 41   | 40.6            | 0.39 (0.11)         | <b>1.6</b>               | 0.002   | 1.4 | 1.8 | 3.6 | 7.6       | 0.21 (0.02)    | 14.8 | <0.0001         |
| Utah           | 23.6 | 18.7 | 34.2 | 33.1            | <b>0.57 (0.15)</b>  | <b>2.4</b>               | 0.001   | 1.6 | 3.4 | 3.4 | 8.2       | 0.14 (0.05)    | 9    | 0.012           |
| Vermont        | 5.5  | 3.1  | 7.7  | 0.6             | -0.57 (0.13)        | -10.4                    | <0.0001 | 3.4 | 4.4 | 5.5 | 5.7       | 0.08 (0.06)    | 2.4  | 0.188           |
| Virginia       | 50.5 | 37.6 | 36.4 | 42.1            | -0.38 (0.13)        | -0.7                     | 0.009   | 1.9 | 2.8 | 4.6 | 6.2       | 0.16 (0.02)    | 8.7  | <0.0001         |
| Washington     | 15.5 | 11.7 | 6.6  | 16.2            | -0.30 (0.09)        | -2                       | 0.002   | 1.6 | 1.1 | 1.9 | 6         | 0.15 (0.02)    | 9.1  | <0.0001         |
| West Virginia  | 42.5 | 40.6 | 42.9 | 45              | -0.19 (0.13)        | -0.4                     | 0.171   | 2.9 | 4.9 | 5.4 | <b>10</b> | 0.30 (0.04)    | 10.4 | <0.0001         |
| Wisconsin      | 30.5 | 22.1 | 22.7 | 16.2            | -0.41 (0.06)        | -1.3                     | <0.0001 | 2.5 | 1.9 | 4.8 | 4.8       | 0.14 (0.02)    | 5.5  | <0.0001         |
| Wyoming        | 18.9 | 24.8 | 12.8 | 53.1            | 0.30 (0.27)         | <b>1.6</b>               | 0.279   | 0.3 | 5.1 | 3.5 | 5.8       | 0.08 (0.06)    | 29.4 | 0.228           |
| <b>Bolded</b>  |      |      |      | <b>&gt;=100</b> |                     | <b>+ &amp;<br/>&gt;0</b> |         |     |     |     |           | <b>&gt;=10</b> |      | <b>&gt;=100</b> |

Figure S1A. Temporal trends of YPLL due to heart failure in the United States, 1991-2015.

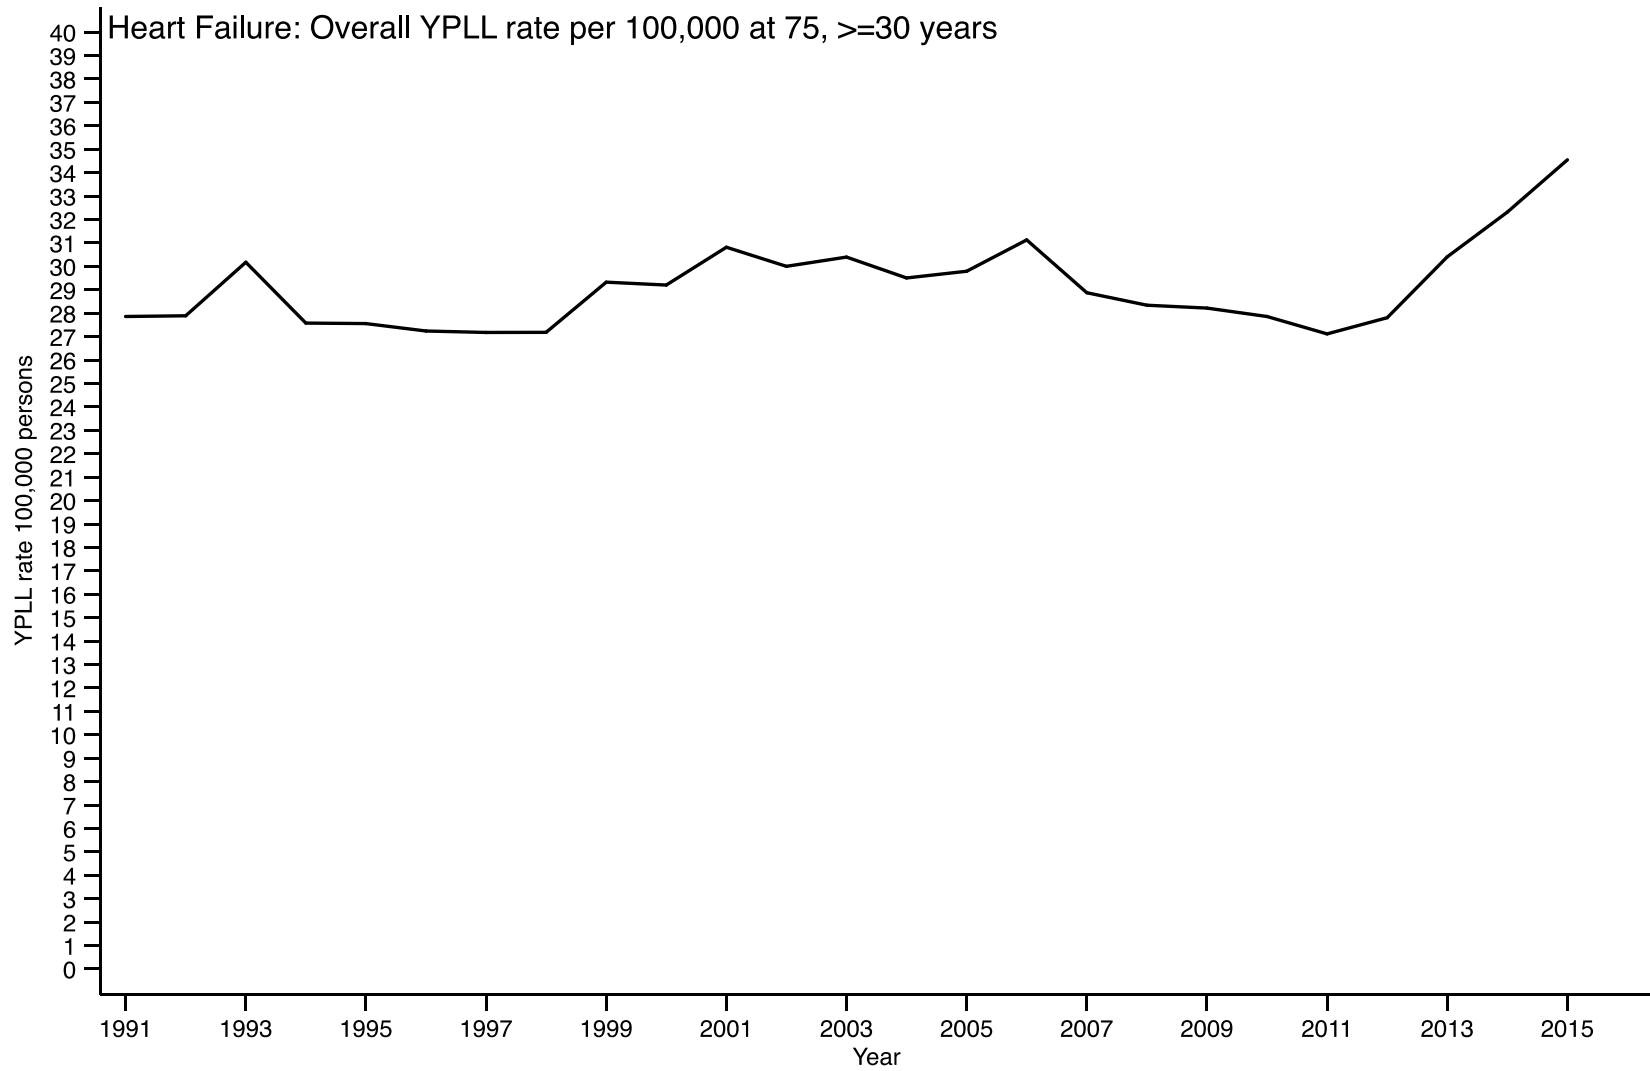



Figure S1B. Temporal trends of sex-specific YPLL due to heart failure in the United States, 1991-2015.

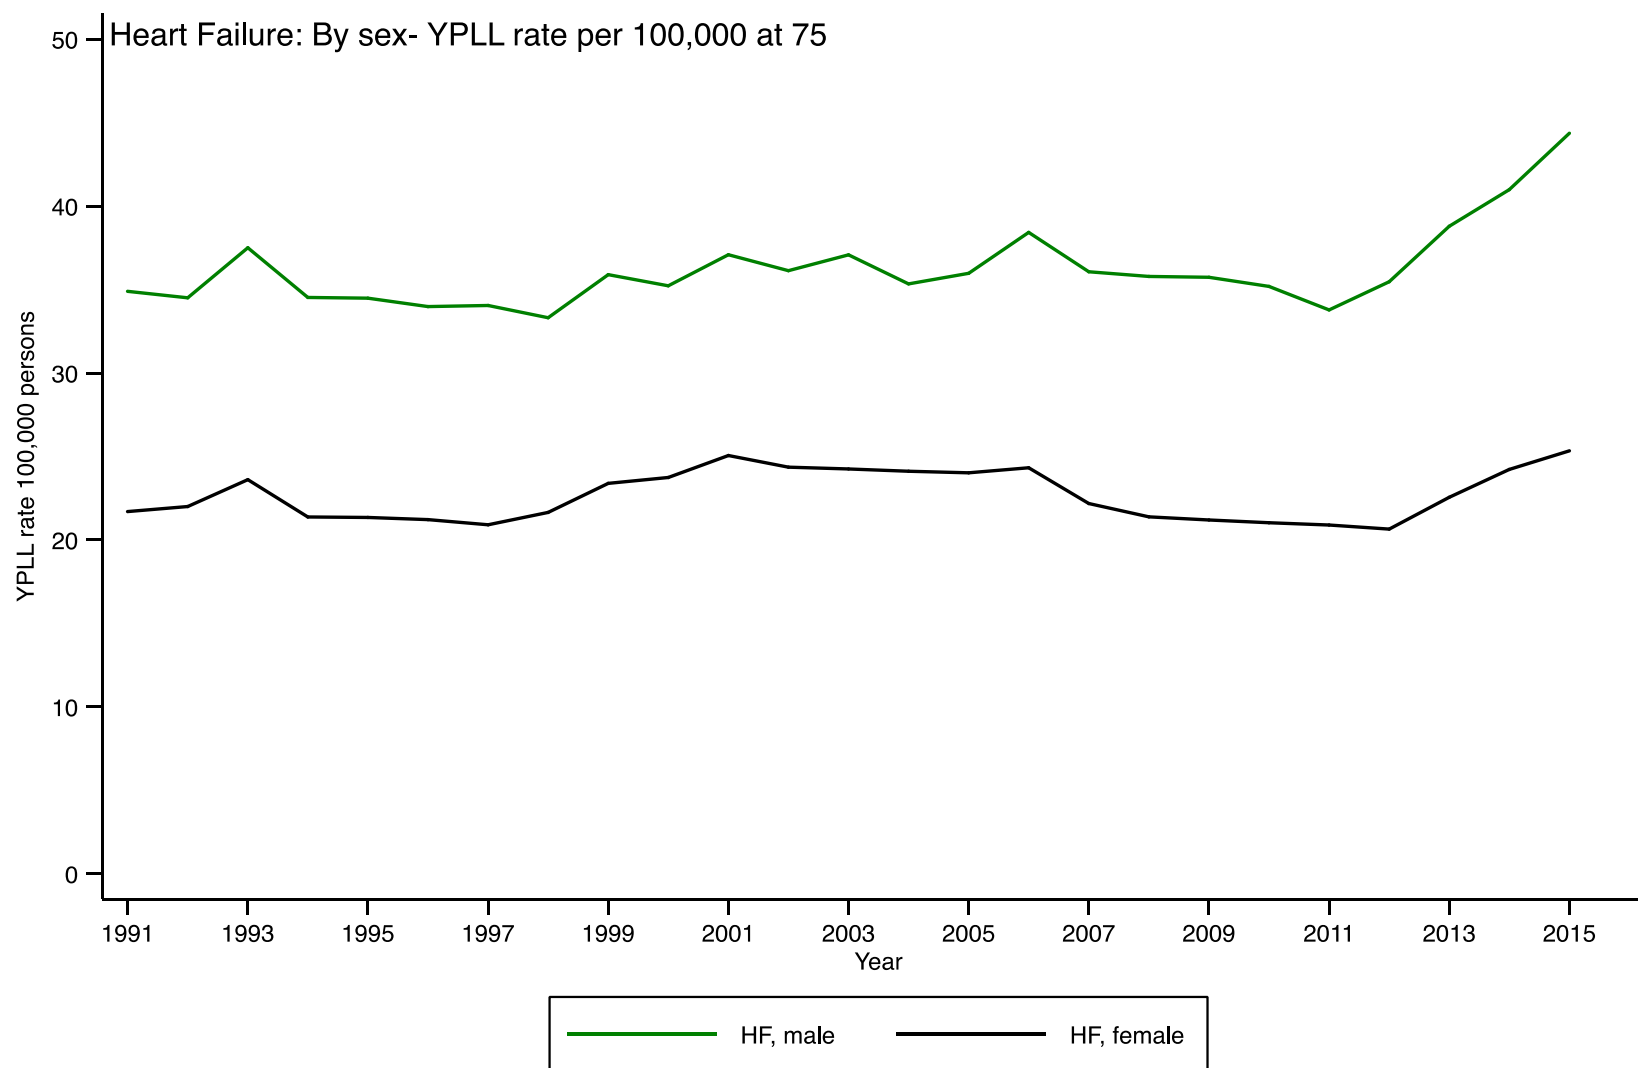

Figure S1C. Temporal trends of race-specific YPLL due to heart failure in the United States, 1991-2015.

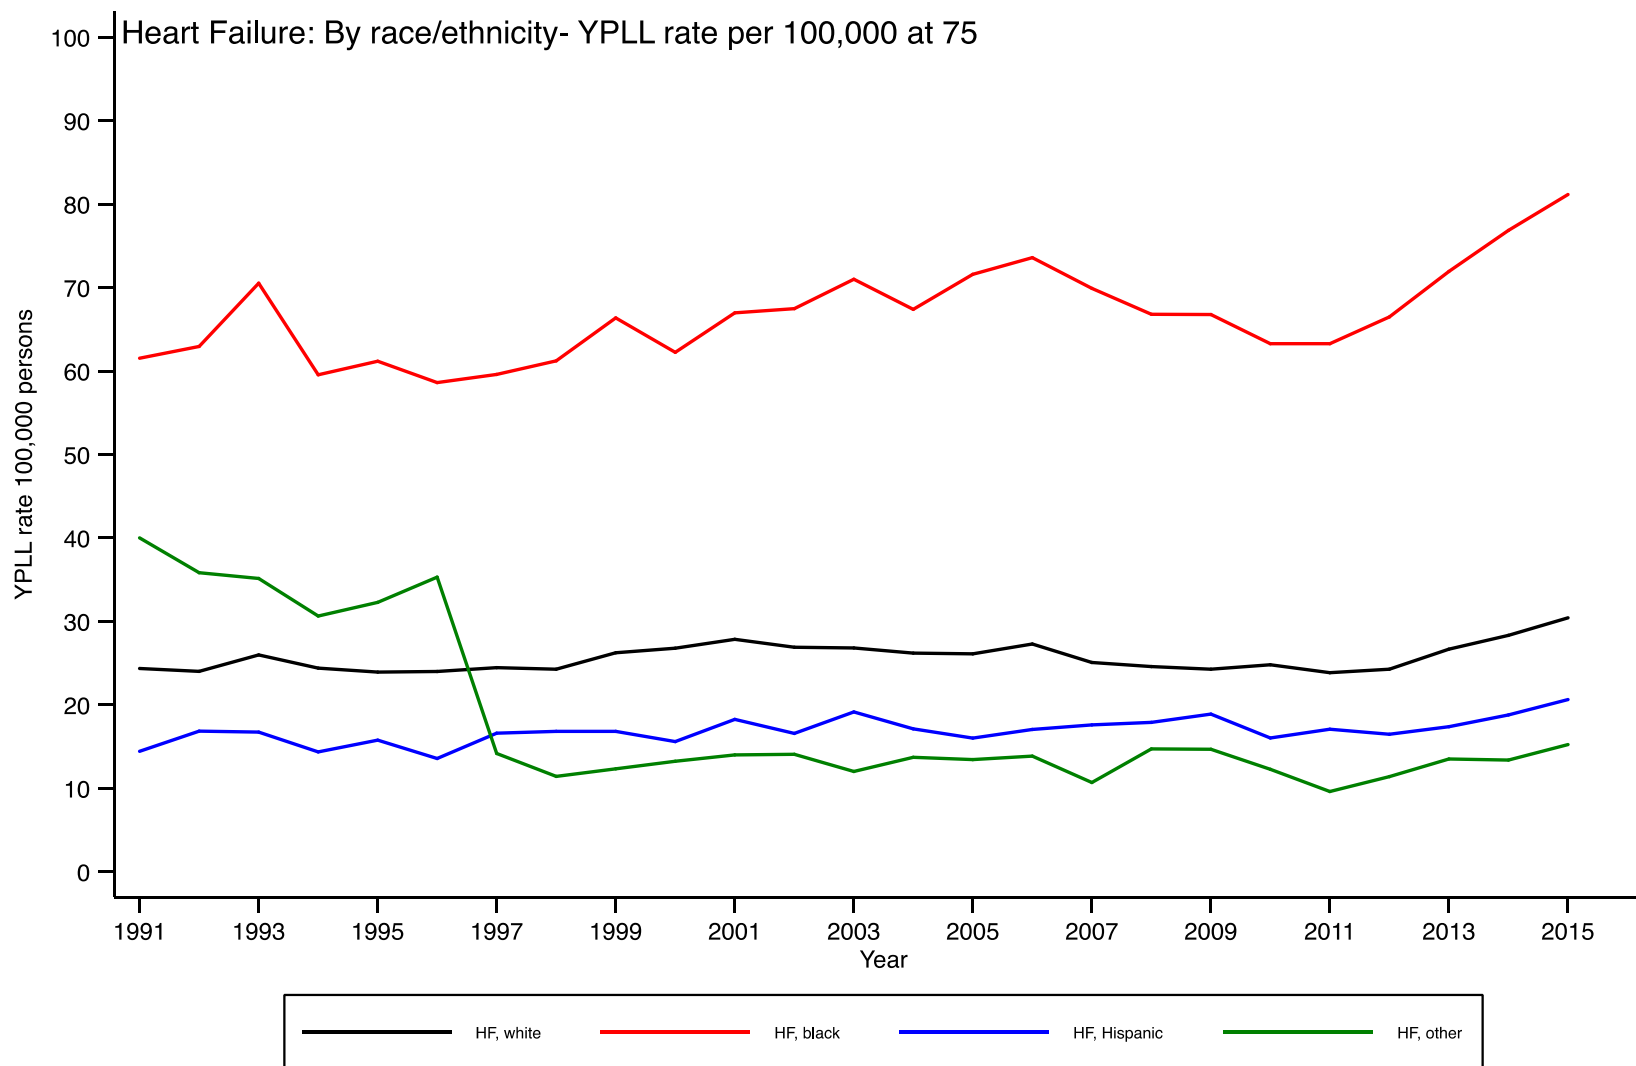

**Figure S2A. Temporal trends of YPLL due to AF in the United States, 1991-2015.**

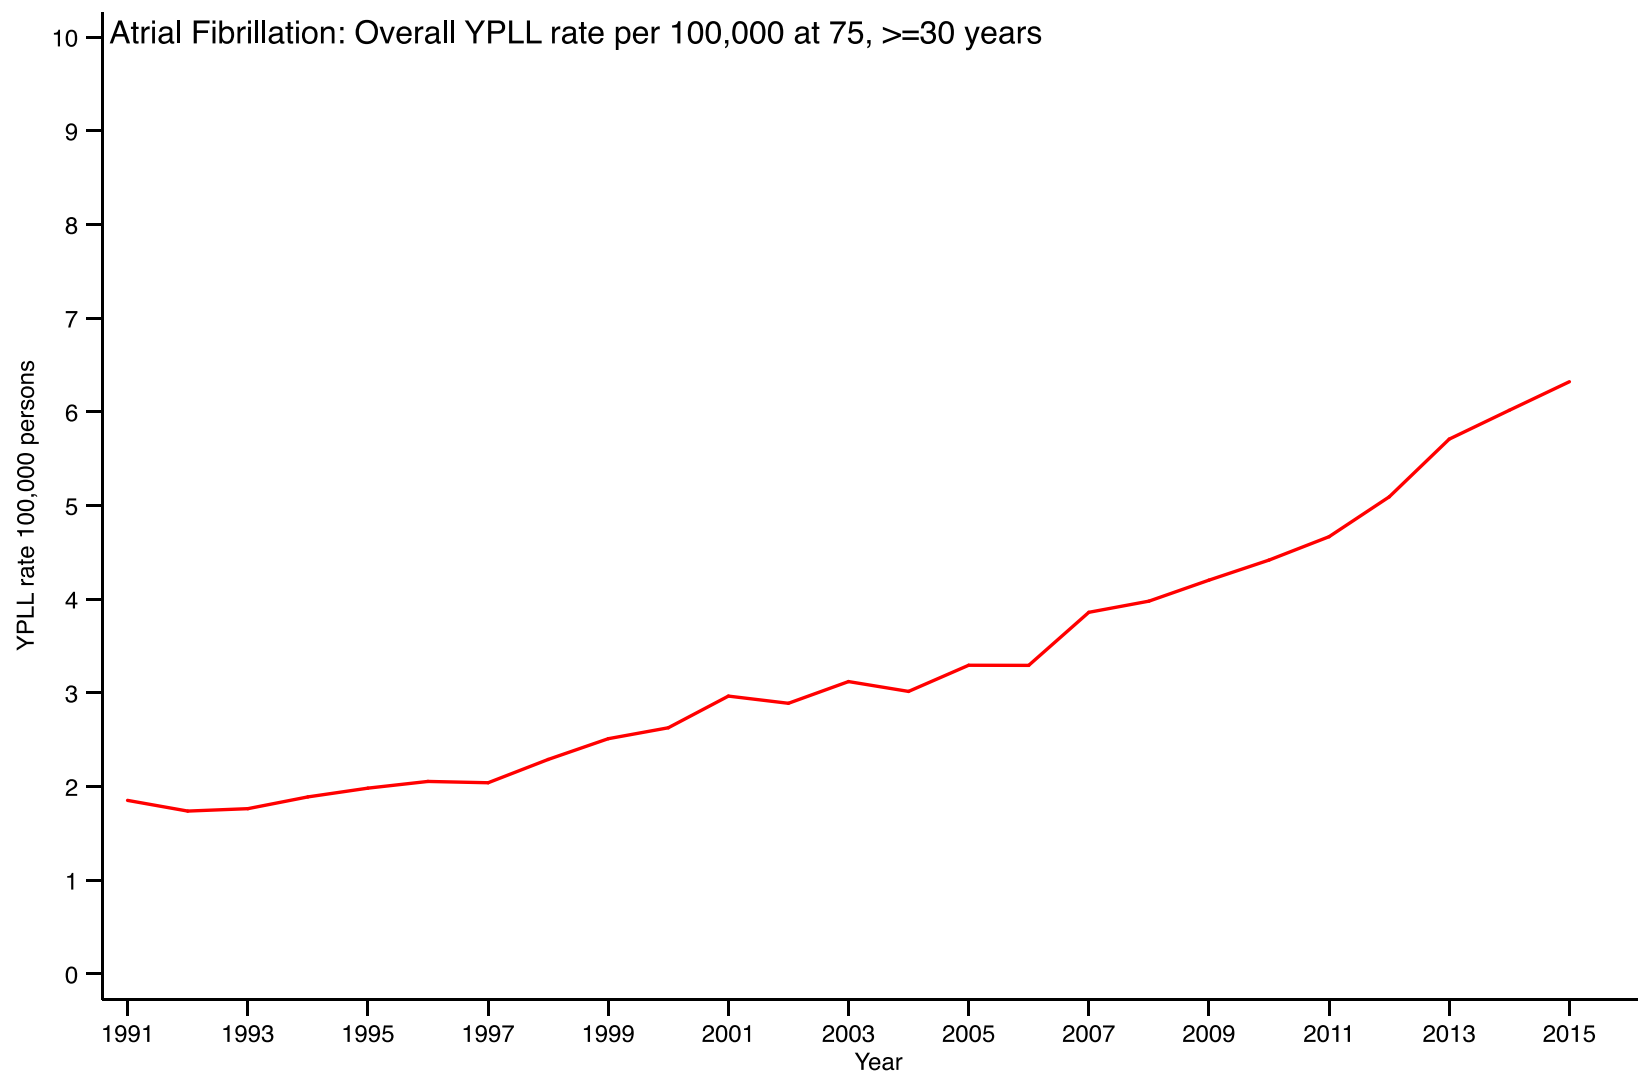

Figure S2B. Temporal trends of sex-specific YPLL due to AF in the United States, 1991-2015.

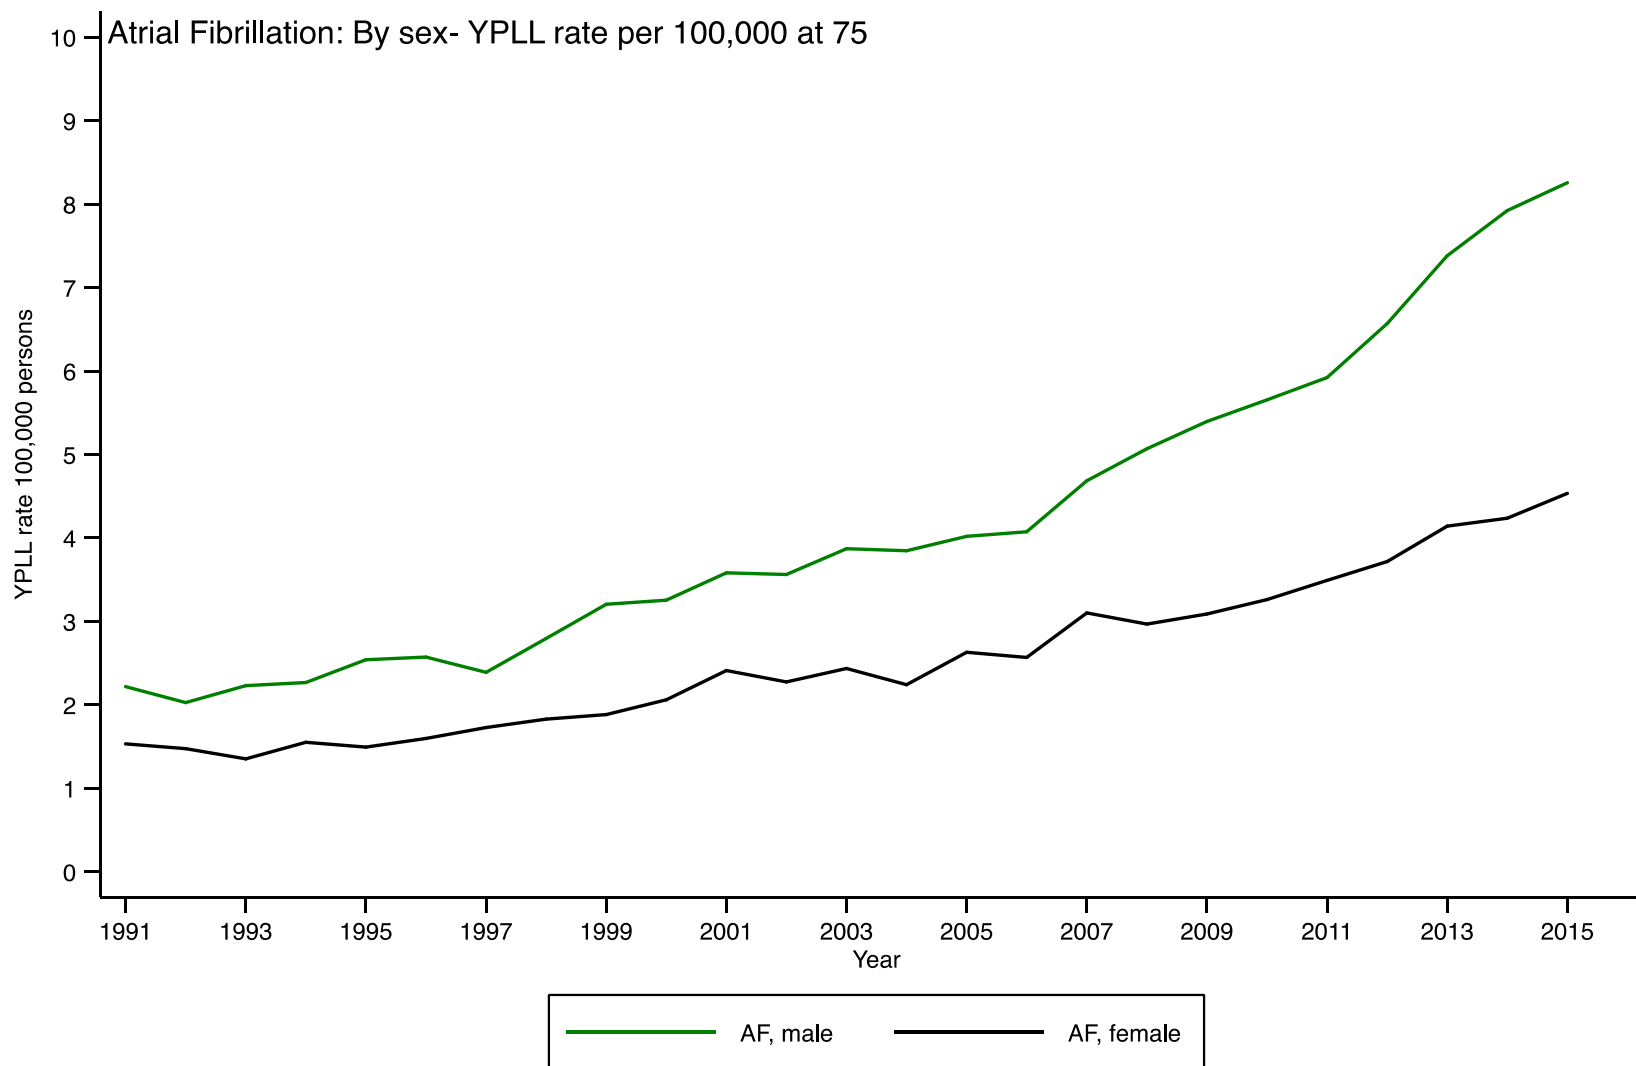

Figure S2C. Temporal trends of race-specific YPLL due to AF in the United States, 1991-2015.

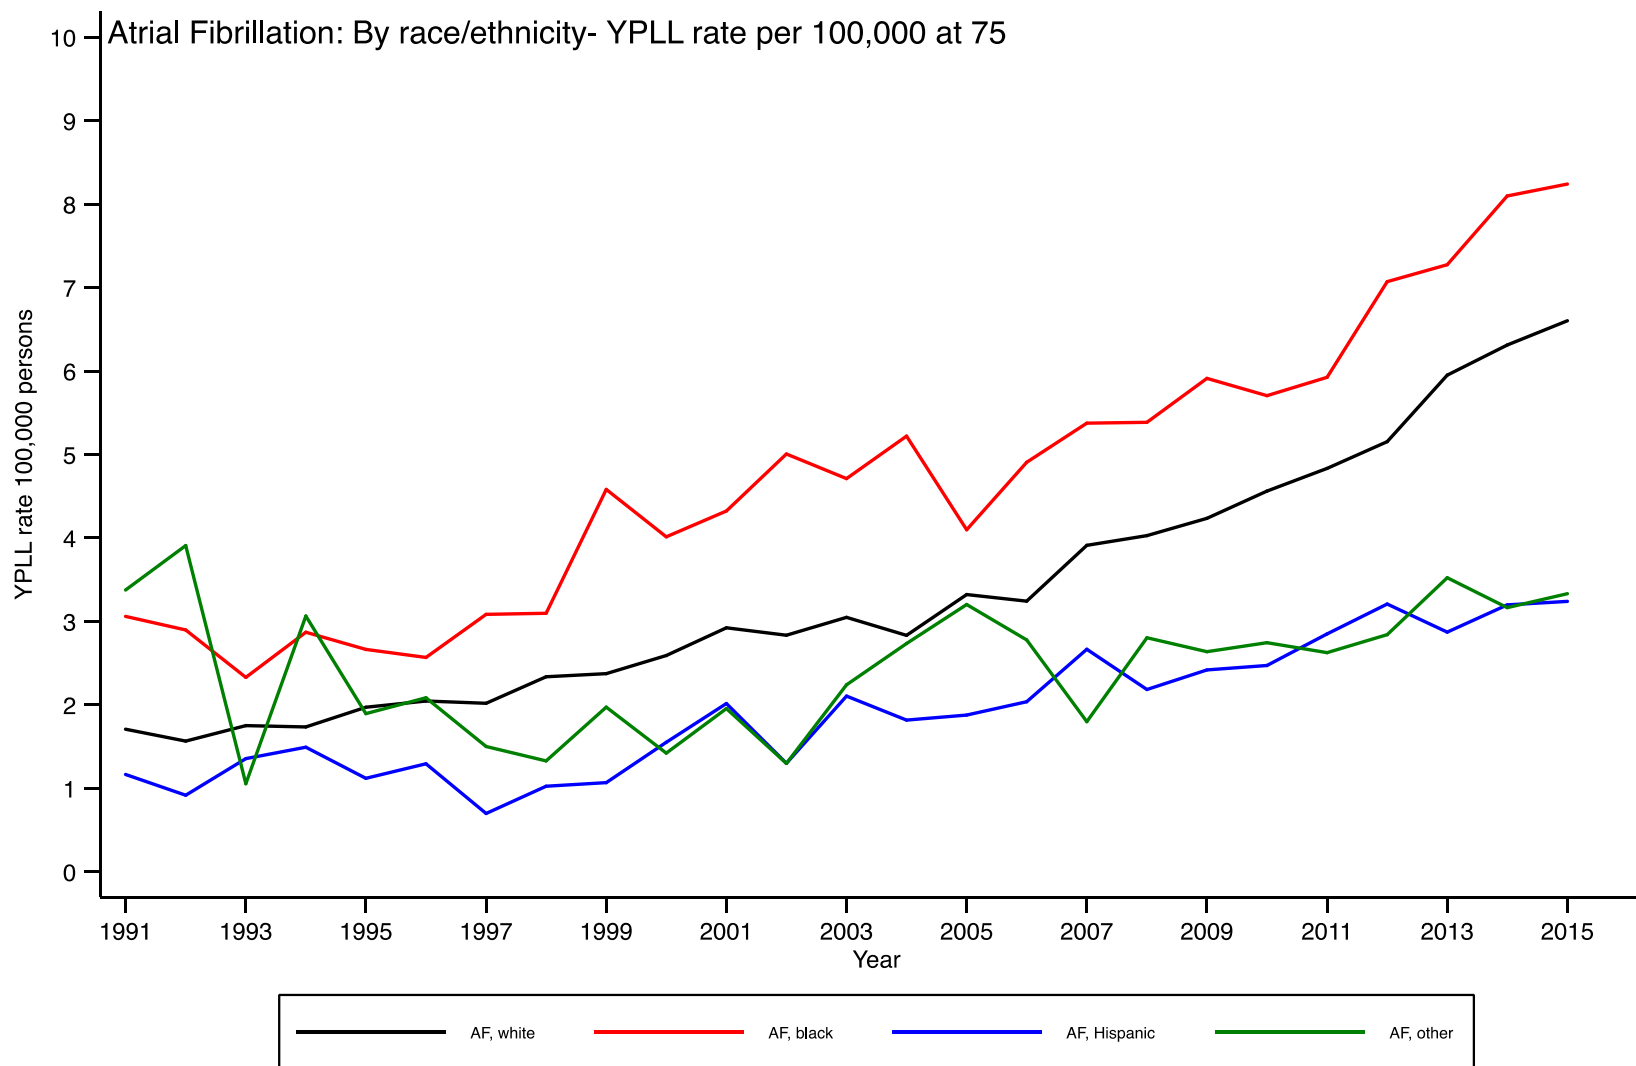

Figure S3. Mean age of heart failure deaths by race/ethnicity in the United States, 1991-2015.

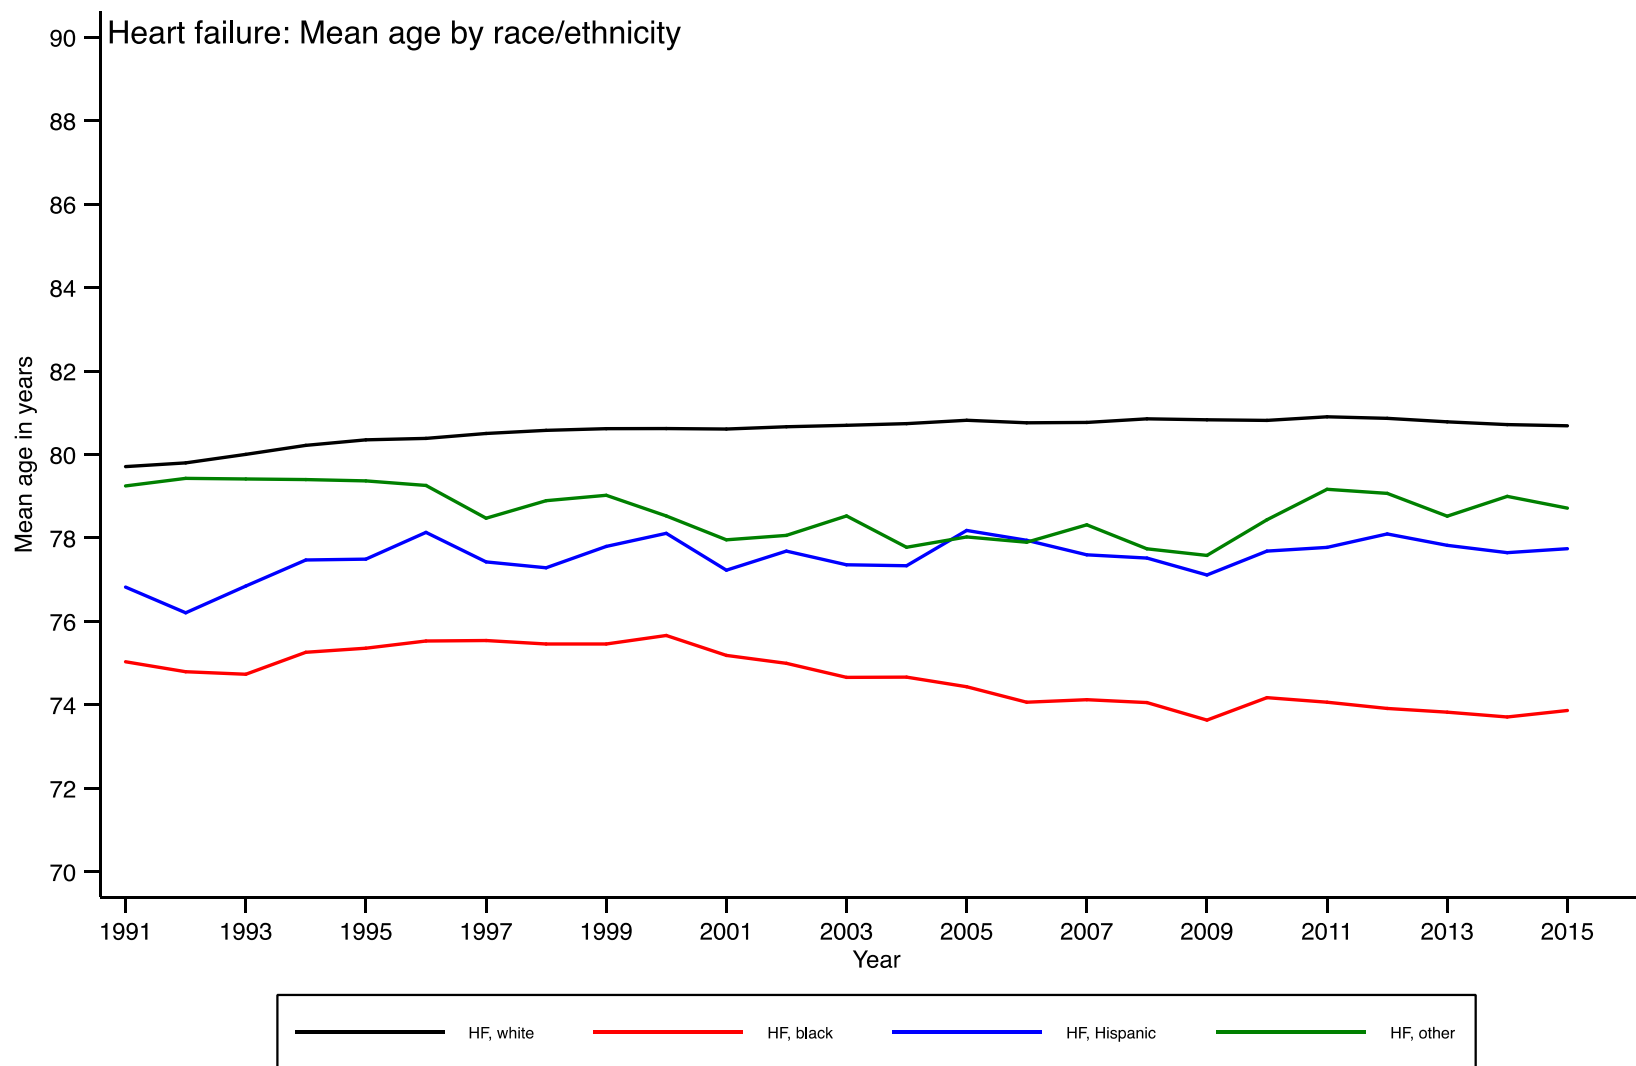

**Figure S4. Mean age of atrial fibrillation deaths by race/ethnicity in the United States, 1991-2015.**

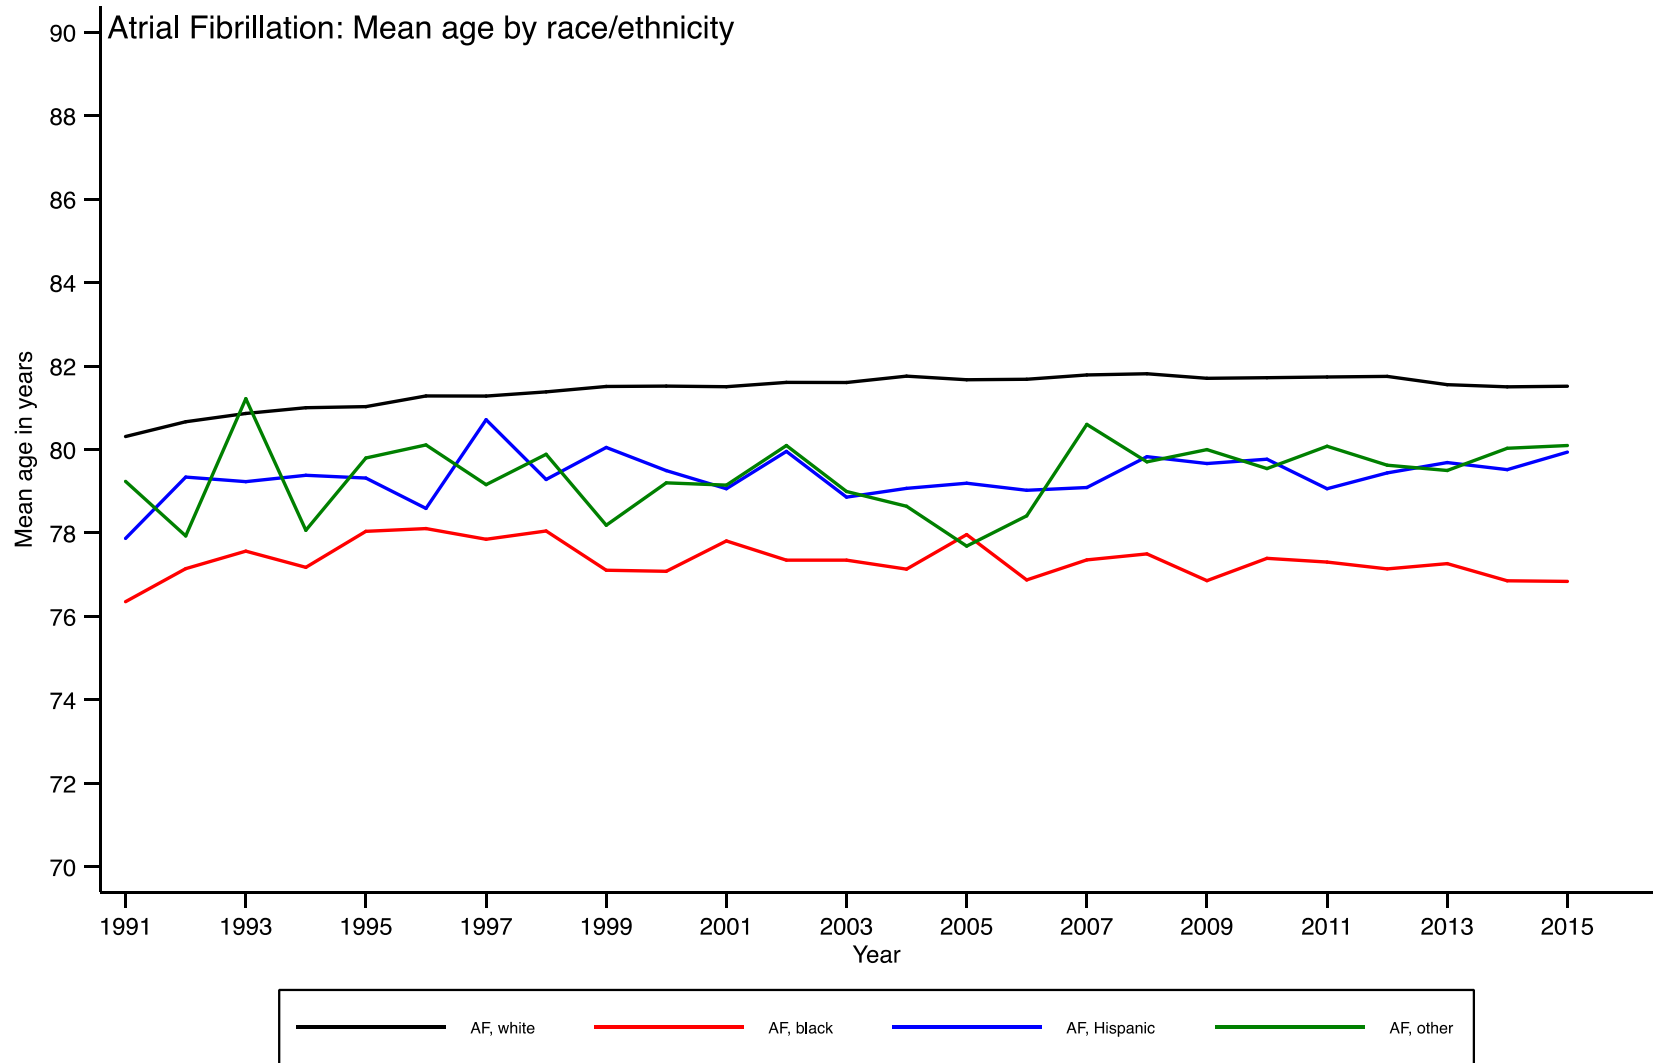

**Supplemental Video Legends:**

**Video S1. Transitioning choropleth map showing spatiotemporal changes in the mortality rates due to heart failure, 1990-2015.** Best viewed with Windows Media Player.

**Video S2. Transitioning choropleth map showing spatiotemporal changes in mortality rates due to AF, 1990-2015.** Best viewed with Windows Media Player.
